# Supplementary material
Source: PubMed Central journal article supplement (PMC4297739)
Supplement: NIHMS626455-supplement-1.pdf [file NIHMS626455-supplement-1.pdf]

| Antibody                                                                     | Host   | For Detection Of:          | Source                              | Application | Dilution/Concentration  |
|------------------------------------------------------------------------------|--------|----------------------------|-------------------------------------|-------------|-------------------------|
| anti-MAC1                                                                    | Mouse  | Macrophages                | Abcam (ab22506)                     | IHC-P       | 1:1000                  |
| anti-CD4                                                                     | Mouse  | CD4+ T-cells               | Abcam (ab57312)                     | IHC-P       | 1:100                   |
| anti-(HMB45 + MART1)                                                         | Mouse  | Malignant Melanoma         | Abcam (ab732)                       | IHC-P       | 1:100                   |
| anti-pAKT                                                                    | Rabbit | Phosphorylated AKT Protein | Cell Signaling (4060)               | WB, IHC-P   | 1:2000 (WB), 1:50(IHC)  |
| anti-PTEN                                                                    | Rabbit | PTEN Protein               | Cell Signaling (9559)               | WB, IHC-P   | 1:1000 (WB), 1:300(IHC) |
| anti-CDK4                                                                    | Mouse  | CDK4 Protein               | Santa Cruz (sc260)                  | IHC-P       | 1:100                   |
| anti-p53                                                                     | Rabbit | p53 Protein                | Santa Cruz (sc-6243)                | WB          | 1:500                   |
| anti-p53                                                                     | Rabbit | p53 Protein                | Leica (NCL-p53-CM5p)                | IHC-P       | 1:500                   |
| anti-AKT                                                                     | Rabbit | Total AKT Protein          | Cell Signaling (6727)               | WB          | 1:1000                  |
| anti-ERK(p44/42 MAPkinase)(137F5)                                            | Rabbit | Total ERK Protein          | Cell Signaling (4695)               | WB          | 1:1000                  |
| anti-pERK                                                                    | Rabbit | Phosphorylated ERK Protein | Abcam (ab50011)                     | WB          | 1:1000                  |
| anti-cyclinD1                                                                | Mouse  | Cyclin D1 Protein          | Cell Signaling (2926)               | WB          | 1:2000                  |
| anti-CD31                                                                    | Rabbit | Tumor Angiogenesis         | Abcam (ab28364)                     | IHC-P       | 1:50                    |
| anti-PEP1 (TYRP1)                                                            | Rabbit | Melanocytic Cells          | NIH (kindly provided by V. Hearing) | IHC-P       | 1:1000                  |
| anti-PCNA                                                                    | Mouse  | Proliferating Cells        | Abcam (ab29)                        | IHC-P       | 1:6000                  |
| anti-B-actin                                                                 | Rabbit | Loading Control            | Bethyl Lab (A300-491A)              | WB          | 1:5000                  |
| <i>IHC-P = Immunohistochemistry - Paraffin Sections    WB = Western Blot</i> |        |                            |                                     |             |                         |

**Supplementary Table S1: Antibodies used for experiments.**

| Gene           | Primer Name         | Sequence (5'-3')          | Expected Bands                                              |
|----------------|---------------------|---------------------------|-------------------------------------------------------------|
| <i>K14-Cre</i> | TK139 (Forward)     | ATTTGCCTGCATTACCGGTC      | 349 bp ( <i>Cre</i> +),<br>No amplification ( <i>Cre</i> -) |
|                | TK141 (Reverse)     | ATCAACGTTTTGTTTTCCGG      |                                                             |
| <i>Rxra</i>    | UN128 (Forward)     | CTCAAGTGAGGTGGACATTA      | 203 bp ( <i>L2</i> ), 110 bp ( <i>L-</i> )                  |
|                | WH231 (Reverse)     | GAGCTATTGTGCCCTGGAAG      |                                                             |
|                | WH233 ( <i>L-</i> ) | GGAAGCCCAAGATGACCCTC      |                                                             |
| <i>Cdk4</i>    | BAB493 (Forward)    | TGAAGTGCAGAATCTTCGGTGCAAA | 440 bp ( <i>WT</i> ), 530 bp ( <i>R24C</i> )                |
|                | BAB496 (Reverse)    | CATTAGGAACTCTCACACTCTTGAG |                                                             |

**Supplementary Table S2: PCR primers used for genotyping of mouse lines.**
